# Supplementary material for: Amorphous and crystalline cerium(iv) phosphates: biocompatible ROS-scavenging sunscreens
Source: Royal Society of Chemistry journal article supplement (doi:10.1039/d1tb02604f), 2022-01-01
Supplement: d1tb02604f1.pdf [file d1tb02604f1.pdf]

# Supporting information

## Amorphous and crystalline cerium(IV) phosphates: biocompatible ROS-scavenging sunscreens

T.O. Kozlova<sup>1</sup>, A.L. Popov<sup>2</sup>, I.V. Kolesnik<sup>3</sup>, D.D. Kolmanovich<sup>2</sup>, A.E. Baranchikov<sup>1</sup>,  
A.B. Shcherbakov<sup>4</sup>, V.K. Ivanov<sup>1\*</sup>

<sup>1</sup>Kurnakov Institute of General and Inorganic Chemistry of the Russian Academy of Sciences, Moscow 119991, Russia

<sup>2</sup>Institute of Theoretical and Experimental Biophysics of the Russian Academy of Sciences, Pushchino, Moscow region, 142290, Russia

<sup>3</sup>Lomonosov Moscow State University, Materials Science Department, Moscow, 119991, Russia

<sup>4</sup>Zabolotny Institute of Microbiology and Virology, National Academy of Sciences of Ukraine, Kyiv D0368, Ukraine

\* van@igic.ras.ru

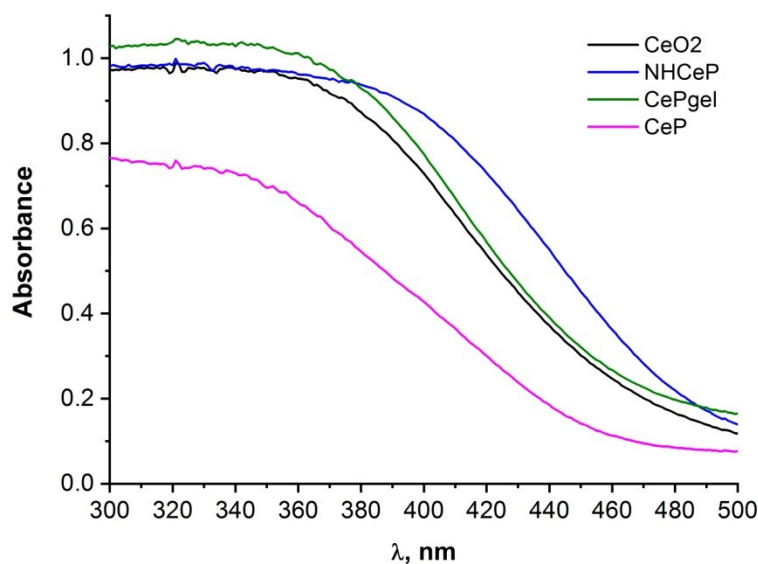

Fig. S1. Absorption spectra of cerium(IV) phosphates: CePgel - amorphous cerium(IV) phosphate, CeP –  $\text{Ce}(\text{PO}_4)(\text{HPO}_4)_{0.5}(\text{H}_2\text{O})_{0.5}$ , NHCeP –  $\text{NH}_4\text{Ce}_2(\text{PO}_4)_3$ . The spectrum of nanocrystalline  $\text{CeO}_2$  is also shown as a reference.
